# Supplementary material for: FebriDx point-of-care test in patients with suspected COVID-19: a systematic review and individual patient data meta-analysis of diagnostic test accuracy studies
Source: bioRxiv or medRxiv preprint supplement (doi:10.1101/2020.10.15.20213108), 2021-06-11

## Supplementary material 5

PRISMA-IPD flow diagram.

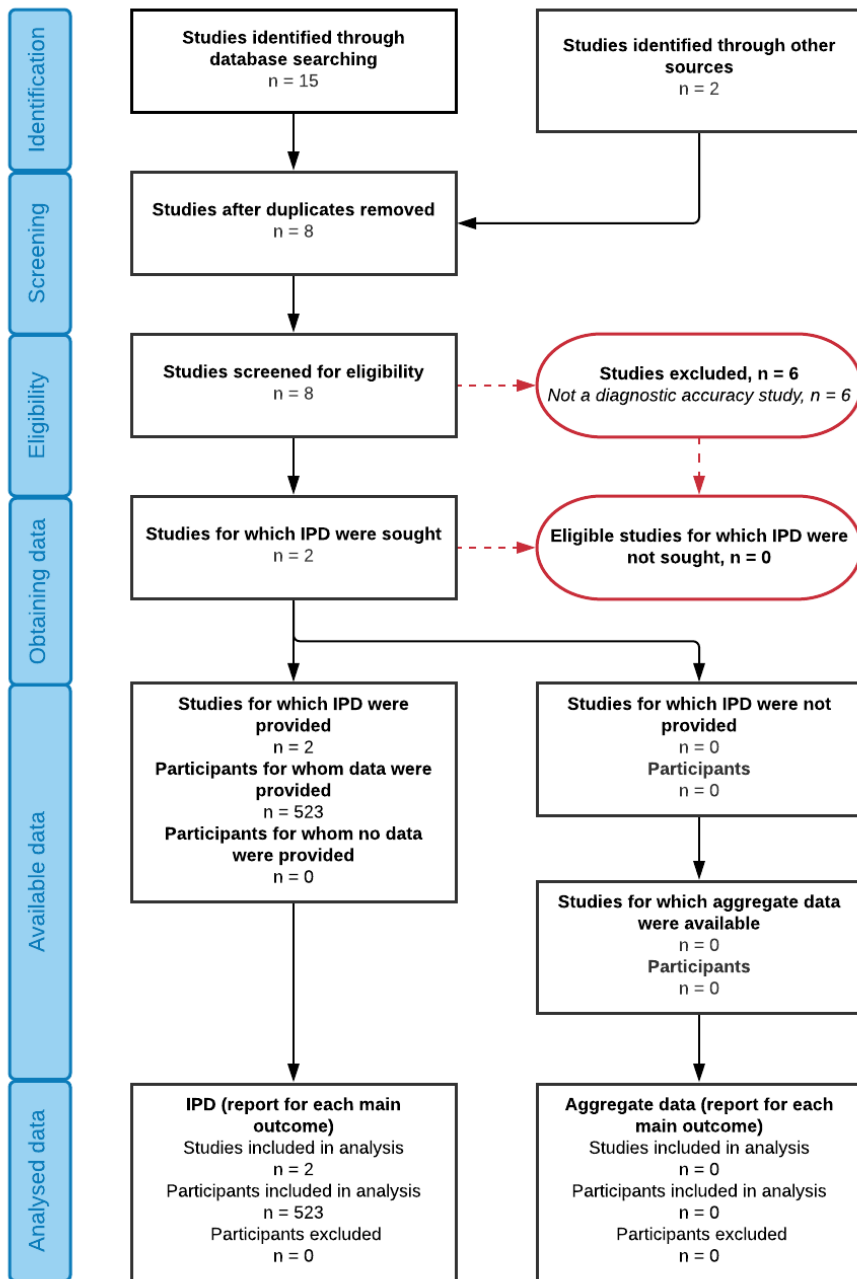

Supplement: Supplementary file [file media-5.pdf]
